# Supplementary material for: In Silico Screening of Potential Phytocompounds from Several Herbs against SARS-CoV-2 Indian Delta Variant B.1.617.2 to Inhibit the Spike Glycoprotein Trimer
Source: MDPI journal article supplement (doi:10.3390/app12020665), 2022-01-11
Supplement: s1 [file s1]

# Supplementary Materials: In Silico Screening of Potential Phytocompounds from Several Herbs against SARS-CoV-2 Indian Delta Variant B.1.617.2 to Inhibit the Spike Glycoprotein Trimer

Bharathi Muruganantham <sup>1</sup>, Bhagavathi Sundaram Sivamaruthi <sup>1,2,\*</sup>, Periyannaina Kesika <sup>1,2</sup>, Subramanian Thangaleela <sup>1</sup> and Chaiyavat Chaiyasut <sup>1,\*</sup>

A)

## STAMP Sequence Alignment

 Identical Residues  
 Similar Residues

```

WT-NTD  QCVNLTTRTQLPPA Y TNSFTRGVYYP DKVFRSSVL HS TQDLFLPFFS NVTWFHAI HVT KR
MT-NTD  QCVNLTTRTQLPPA Y TNSFTRGVYYP DKVFRSSVL HS TQDLFLPFFS NVTWFHAI HVT KR

WT-NTD  FDNPVLPFNDGVYF A STEKS NI I RGWI FGTTLDS K TQSL LI VNNATNVVI KVCEFQFC ND
MT-NTD  FDNPVLPFNDGVYF A STEKS NI I RGWI FGTTLDS K TQSL LI VNNATNVVI KVCEFQFC ND

WT-NTD  PFLGVYYHKNNKS WMESEFRVYSS AN N CTFEYVS Q PFLMDLEGKQGNFKNL REFVFKN I D
MT-NTD  PFLGVYYHKNNKS WMESEFRVYSS AN Q CTFEYVS Q PFLMDLEGKQGNFKNL REFVFKN I D

WT-NTD  GYFKI YSKHTPI NL VRDLPQGFSALE PLVDLP I GI N TRFQTLLALHRS YL TPGDSSS GW
MT-NTD  GYFKI YSKHTPI NL VRDLPQGFSALE PLVDLP I GI Q TRFQTLLALHRS YL TPGDSSS GW

WT-NTD  TAGAAAYYVGYLQP RTFLLKYNENGT I TDAVDCAL DPLS ETKCTLKS FTVE KGI YQTS NF
MT-NTD  TAGAAAYYVGYLQP RTFLLKYNENGT I TDAVDCAL DPLS ETKCTLKS FTVE KGI YQTS NF

WT-NTD  RVQPTESI VRFPNI T NLCPFGEVFNA TRFAS VYAWNRRKRI SNCVADYS VLYNSASFST FK
MT-NTD  RVQPTESI VRFPNI T NLCPFGEVFNA TRFAS VYAWNRRKRI SNCVADYS VLYNSASFST FK

WT-NTD  CYGVS PTKLNDLCF T NVYADS FVI RGDEV RQI APG QTGKI ADYNYKL PDDF TGCVI AWNS
MT-NTD  CYGVS PTKLNDLCF T NVYADS FVI RGDEV RQI APG QTGKI ADYNYKL PDDF TGCVI AWNS

WT-NTD  NNLDS KVGGNYNYL Y RLFKRKS NLKPF ERDI STEI Y QAGS TPCNGVEGFNCY FPLQSYGFQ
MT-NTD  NNLDS KVGGNYNYL Y RLFKRKS NLKPF ERDI STEI Y QAGS TPCNGVEGFNCY FPLQSYGFQ

WT-NTD  PTNGVGYQPYRVVV L SFELLHAPATV CGPKKSTNL VKNKCVNFNFNGLTGT GVLTESN KK
MT-NTD  PTNGVGYQPYRVVV L SFELLHAPATV CGPKKSTNL VKNKCVNFNFNGLTGT GVLTESN KK

WT-NTD  FLPFQQFGRDI ADT T DAVRDPQTLEI LDI TPCSFSG GVS VI TPGTNTS NQVA VLYQDVN CW
MT-NTD  FLPFQQFGRDI ADT T DAVRDPQTLEI LDI TPCSFSG GVS VI TPGTNTS NQVA VLYQDVN CW

WT-NTD  RVYS TGSNVFQTRA G CLI GAHVNNNS YECD
MT-NTD  RVYS TGSNVFQTRA G CLI GAHVNNNS YECD
    
```

**Figure S1.** The sequence alignment for the wild and mutated type NTD in S-Protein.

## S-Protein-N-Domain (Mutated) and Ligands

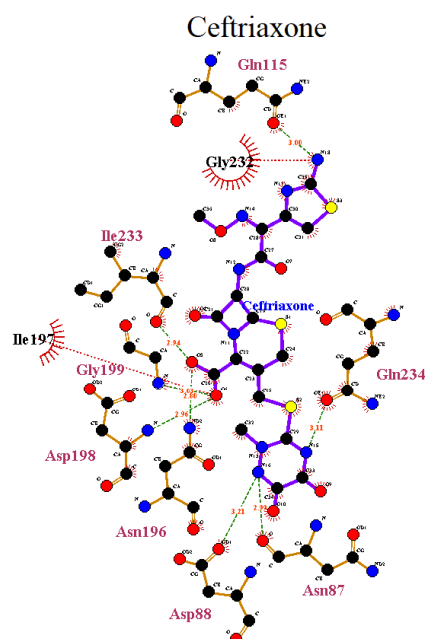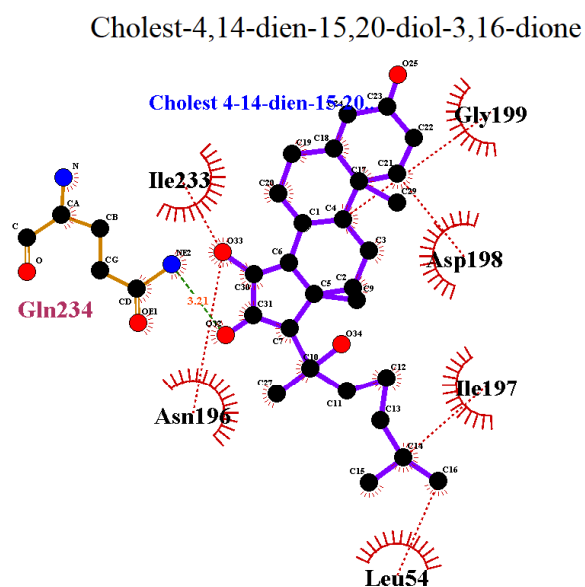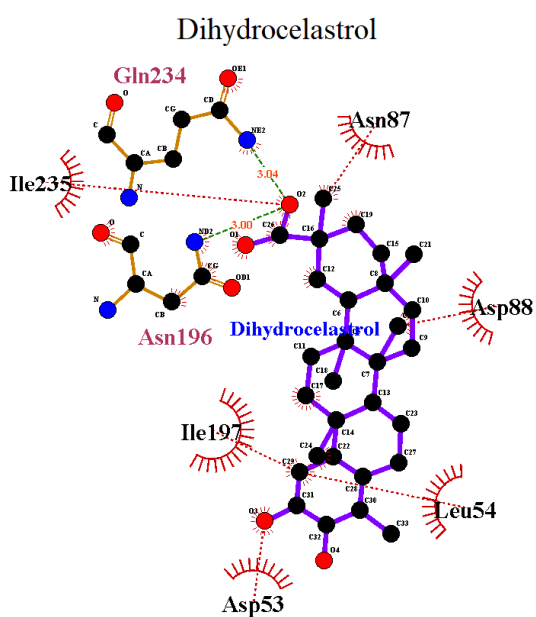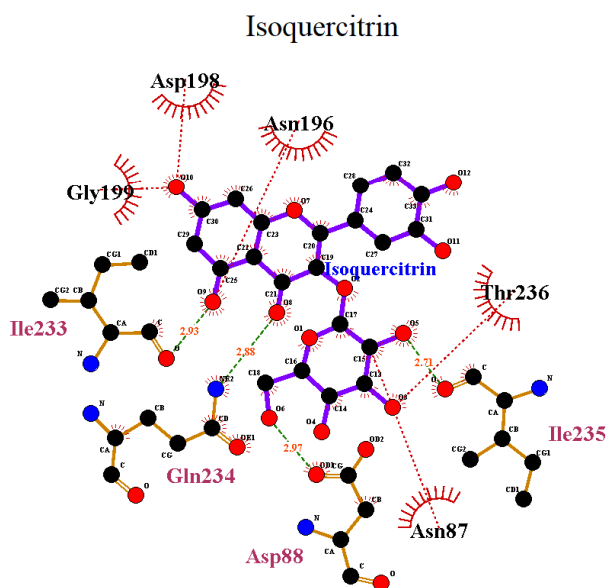

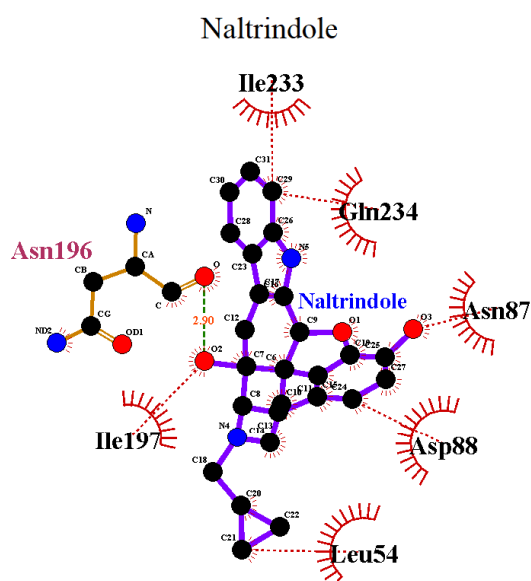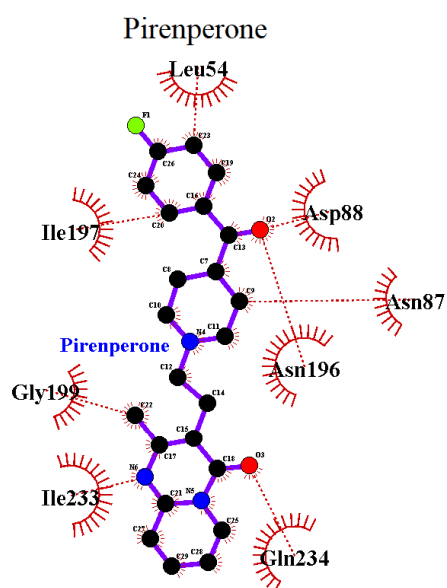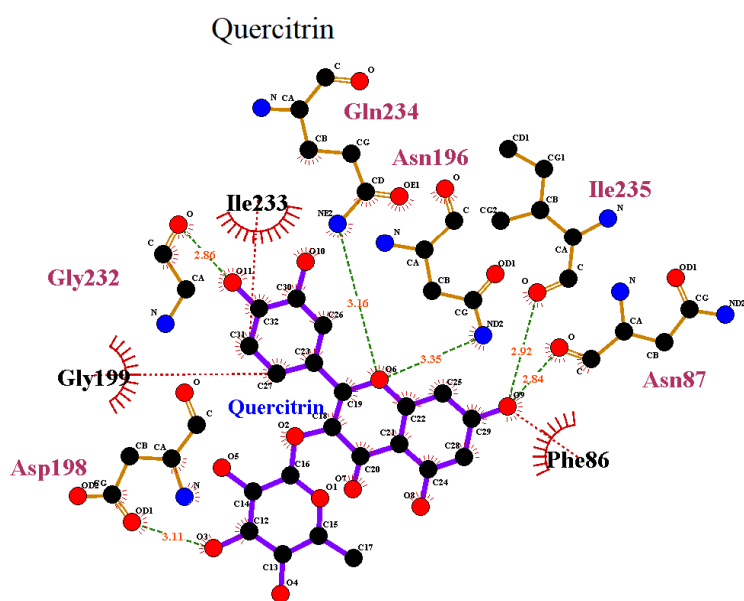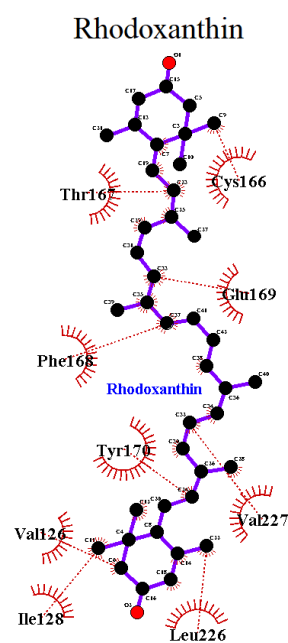

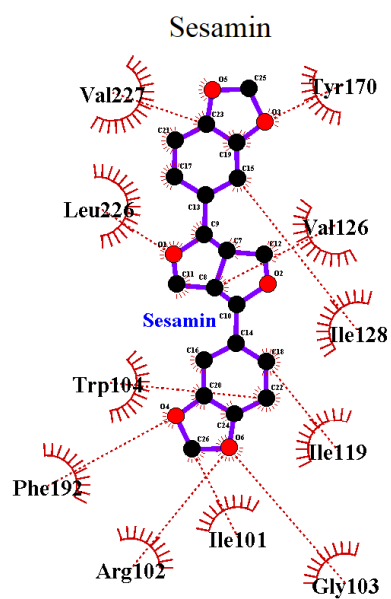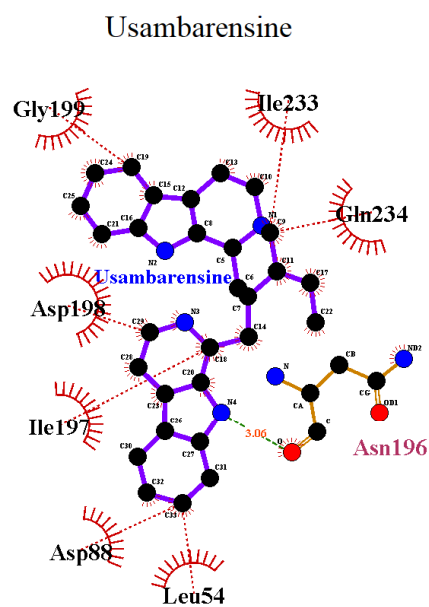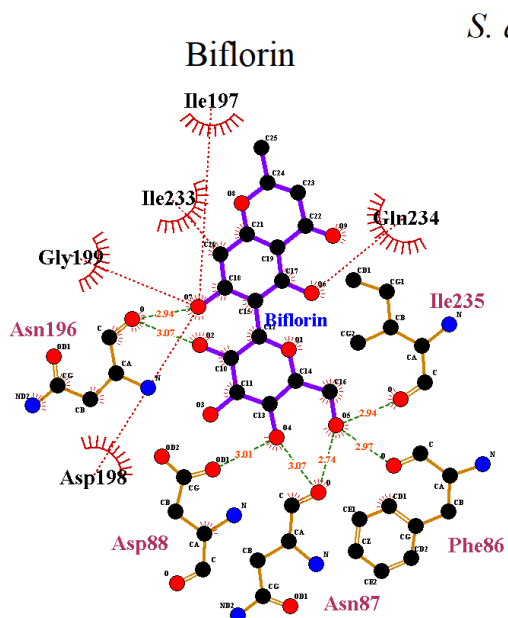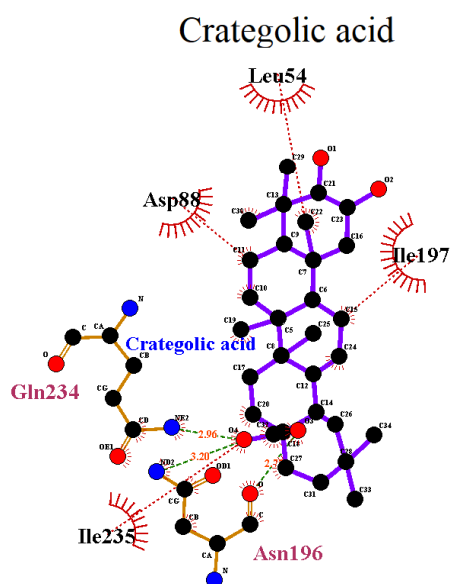

## Rhamnetin

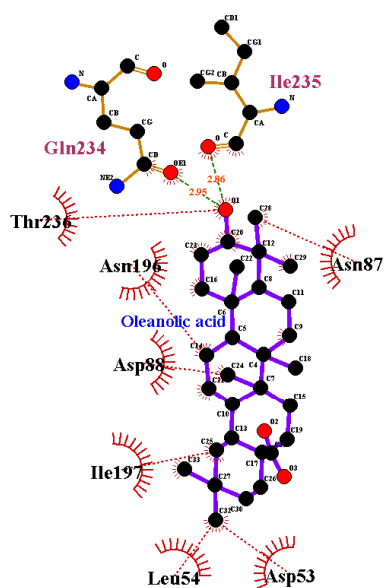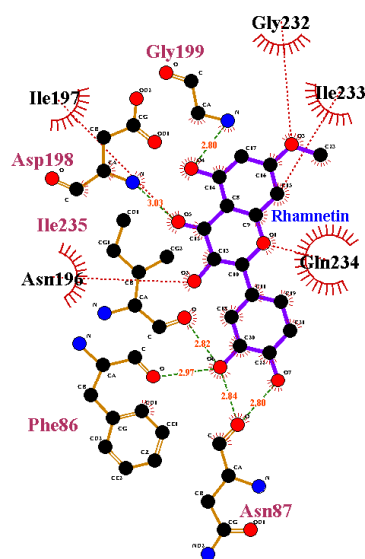

## Kabasura kudineer

Apigenin 7-O-glucoside

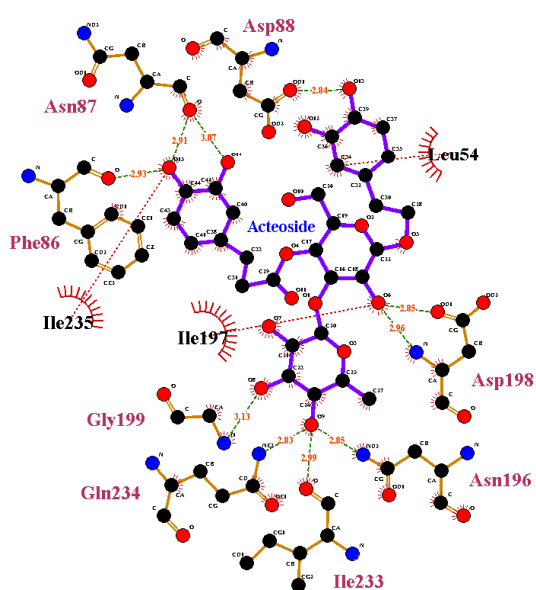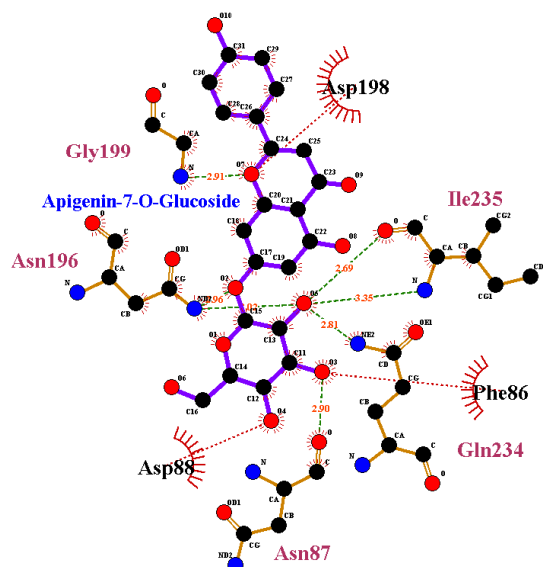

## Neoandrographolide

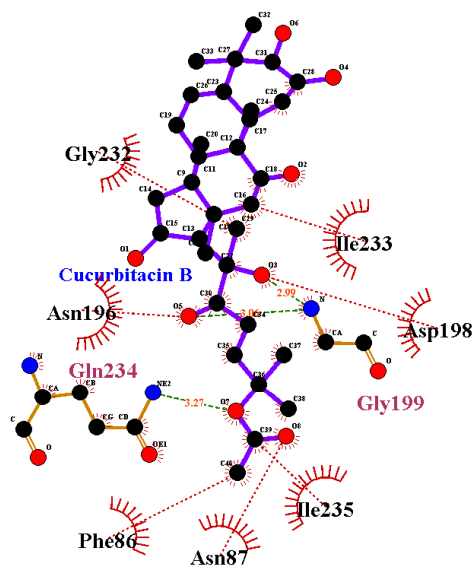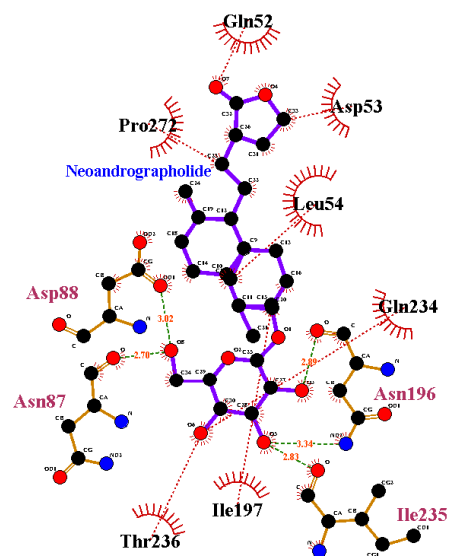

## Rutin

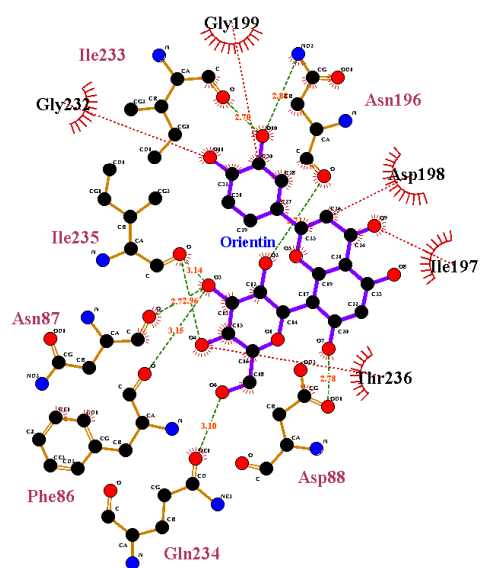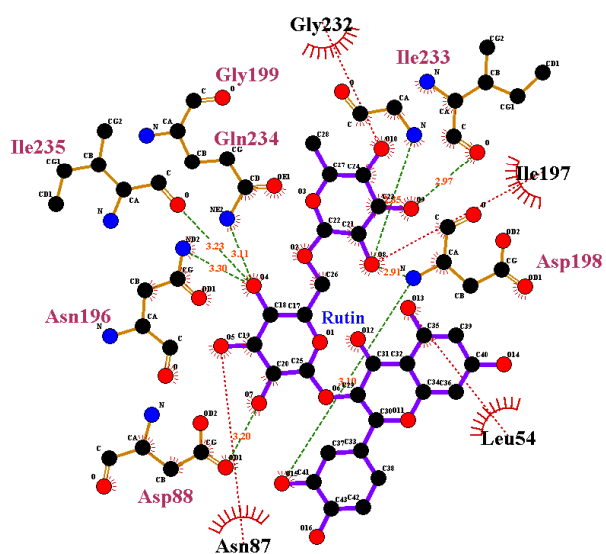

## Tinosporide

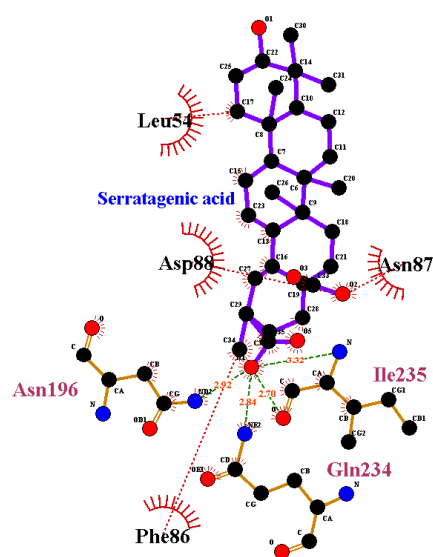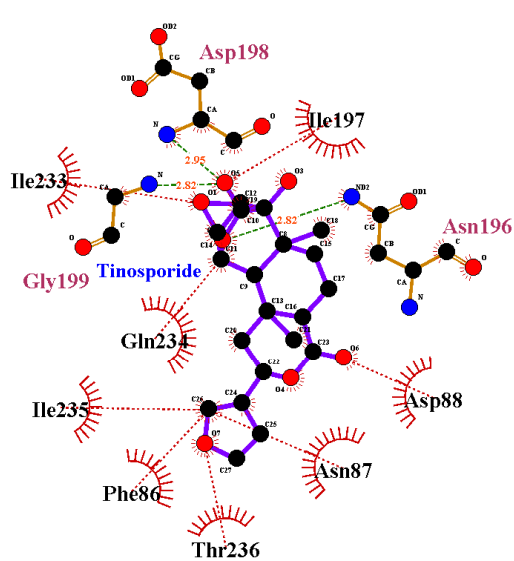

## Vitexin

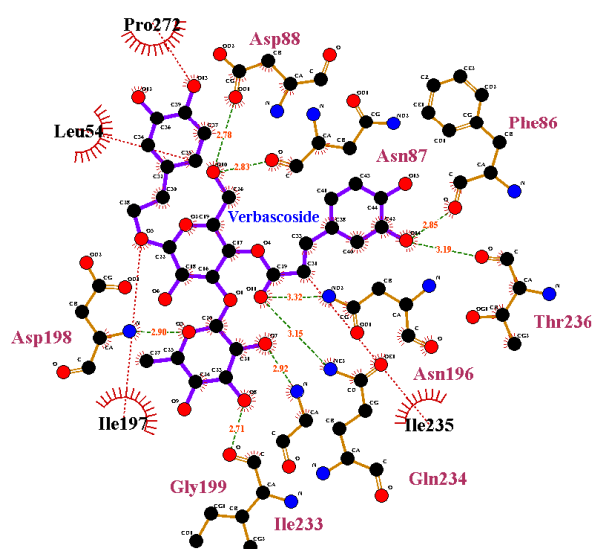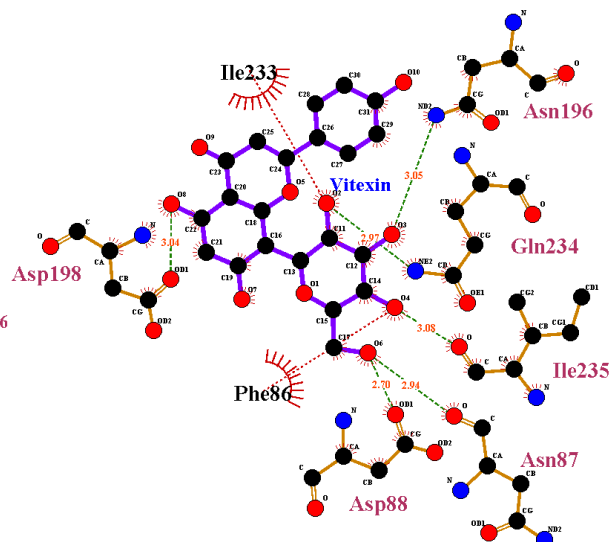

*M. speciosa* (Korth) Haveli

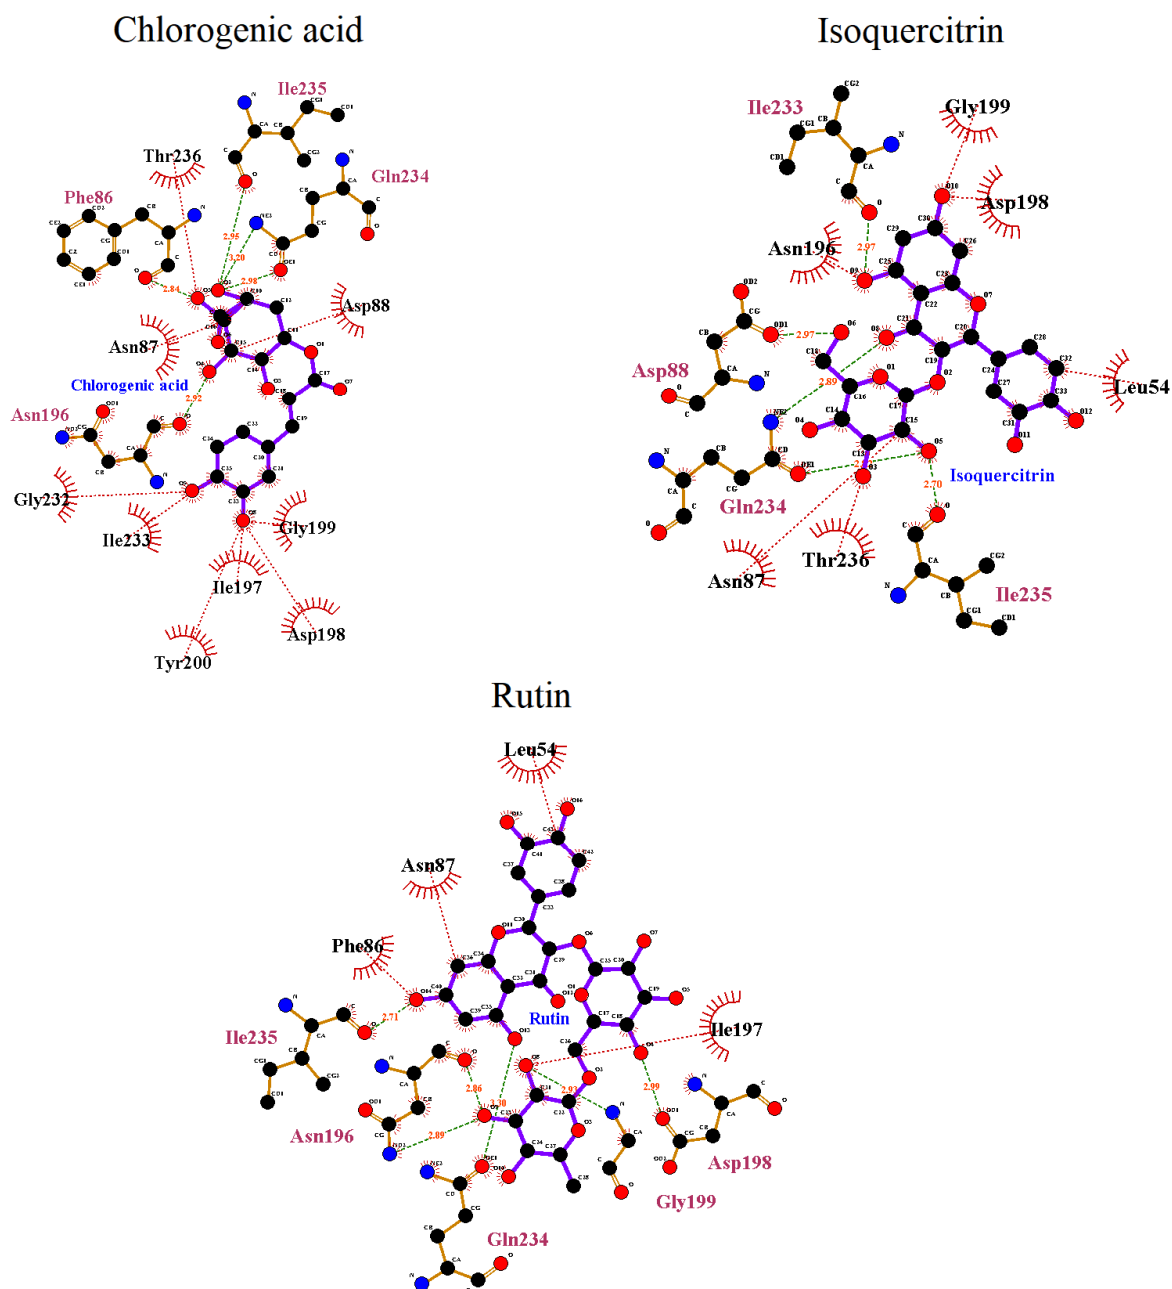

**Figure S2.** The Ligplot interaction for the mutated NTD domain and the screened phytocompounds based on the binding affinity -6.0 kcal/mol.

## S-Protein-RBD Domain and Ligands

*H. cordata*

Canthaxanthin

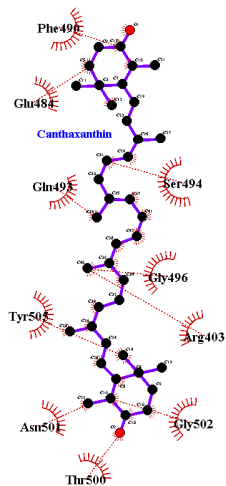

Cholest-4,14-dien-15,20-diol-3,16-dione

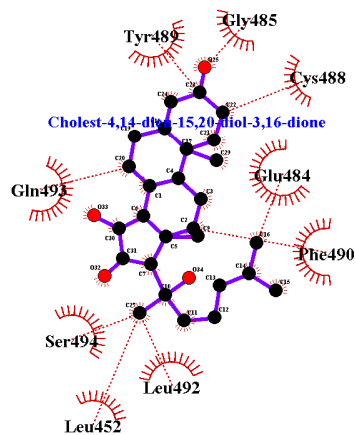

Fluorometholone 17-acetate

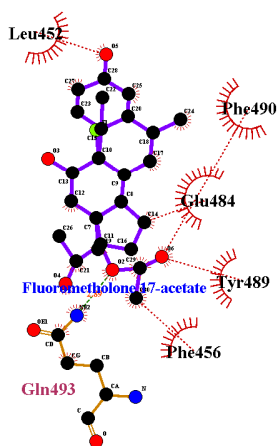

Kanzonol V

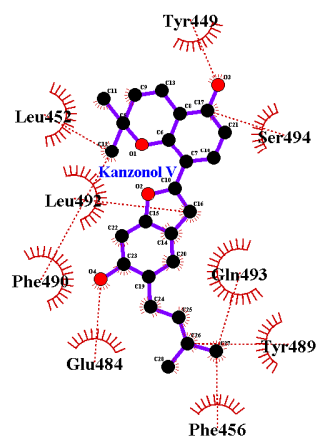

## Progeldanamycin

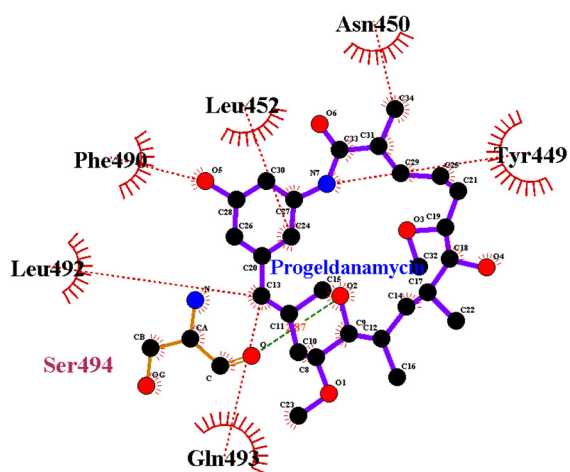

## Rhodoxanthin

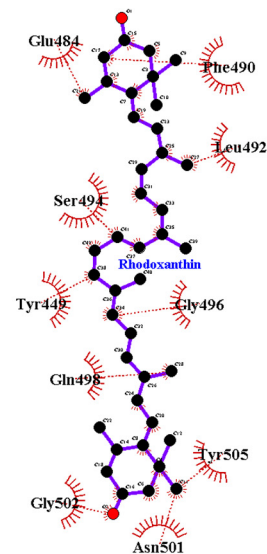

## Stigmastane-3,6-dione, (5.alpha.)

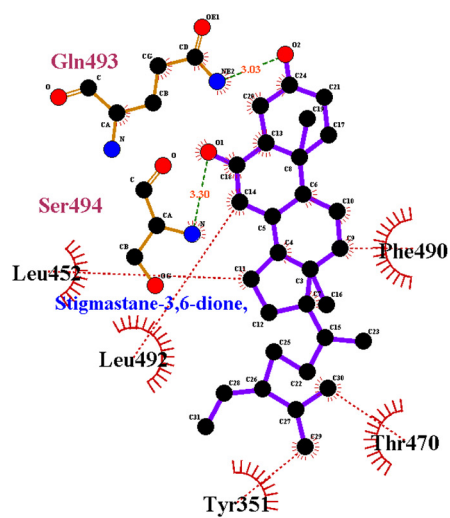

*S. aromaticum*

## Rhamnetin

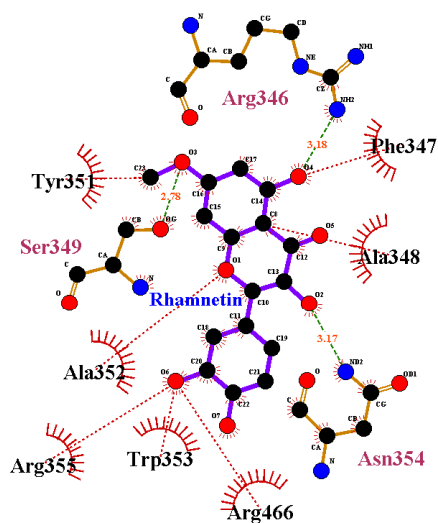

## Kabasura kudineer

## Berberine

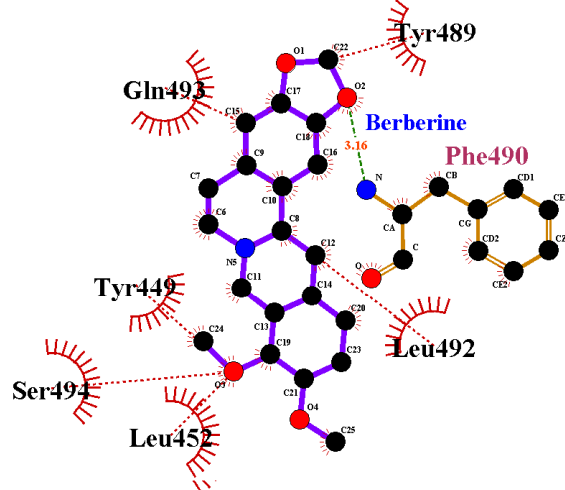

## Clerodermic acid

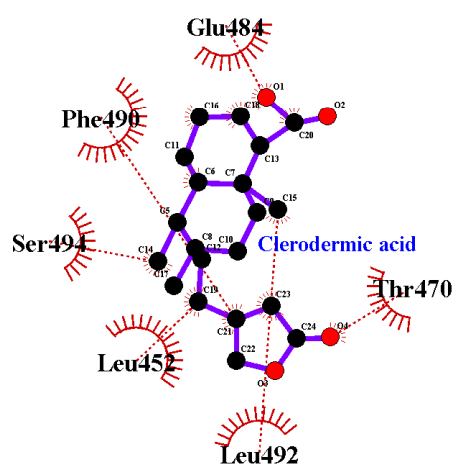

## Diosgenin

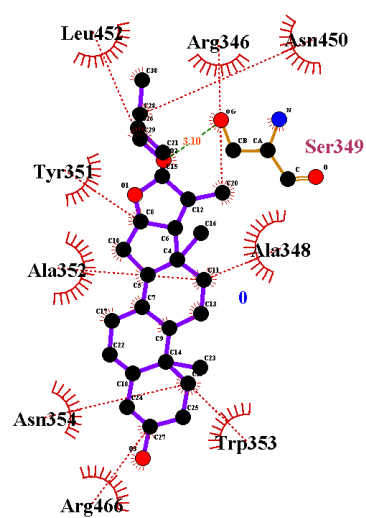

*M. speciosa (Korth) Haveli*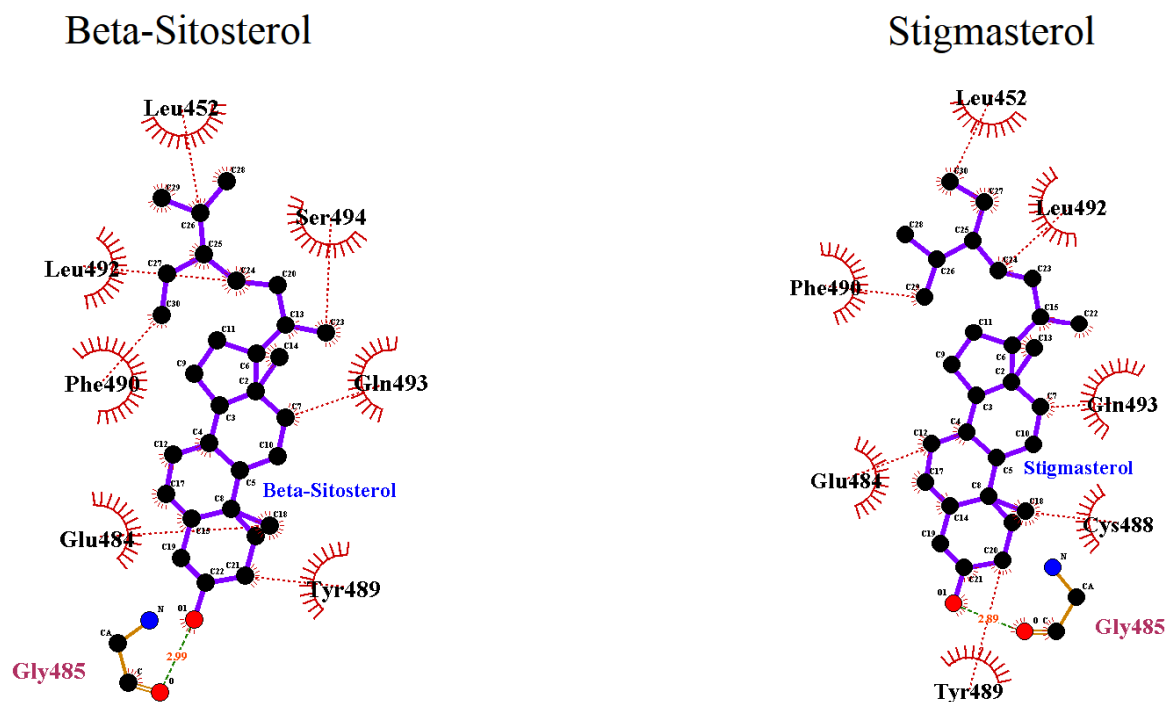

**Figure S3.** The Ligplot interaction for the RBD domain and the screened phytocompounds based on the binding affinity -6.0 kcal/mol.

**Table S1.** The molecular properties of screened phytocompounds with the  $\leq -6.0$  kcal/mol binding energy against mutated NTD Domain.

| Plant Name                                | Compound Name                                          | Molecular Formula                                                            | Mol. Weight (g/mol) | PubChem ID |
|-------------------------------------------|--------------------------------------------------------|------------------------------------------------------------------------------|---------------------|------------|
| <b>B.1.617.2. S-Protein – NTD Mutated</b> |                                                        |                                                                              |                     |            |
| <i>H. cordata</i>                         | Ceftriaxone                                            | C <sub>18</sub> H <sub>18</sub> N <sub>8</sub> O <sub>7</sub> S <sub>3</sub> | 554.6               | 5479530    |
|                                           | Cefuroxime                                             | C <sub>16</sub> H <sub>16</sub> N <sub>4</sub> O <sub>8</sub> S              | 424.4               | 5479529    |
|                                           | 6alpha,9-Difluoro-11beta-hydroxypregn-4-ene-3,20-dione | C <sub>21</sub> H <sub>28</sub> F <sub>2</sub> O <sub>3</sub>                | 366.4               | 255970     |
|                                           | Cholest-4,14-dien-15,20-diol-3,16-dione                | C <sub>27</sub> H <sub>40</sub> O <sub>4</sub>                               | 428.6               | 52931329   |
|                                           | Dihydrocelastrol                                       | C <sub>29</sub> H <sub>40</sub> O <sub>4</sub>                               | 452.6               | 10411574   |
|                                           | Diosgenin                                              | C <sub>27</sub> H <sub>42</sub> O <sub>3</sub>                               | 414.6               | 99474      |
|                                           | Isoquercitrin                                          | C <sub>21</sub> H <sub>20</sub> O <sub>12</sub>                              | 464.4               | 5280804    |
|                                           | Kanzonol                                               | C <sub>25</sub> H <sub>30</sub> O <sub>5</sub>                               | 410.5               | 85088559   |
|                                           | Murrayenol                                             | C <sub>30</sub> H <sub>46</sub> O <sub>4</sub>                               | 470.7               | 73086673   |
|                                           | Naltrindole                                            | C <sub>26</sub> H <sub>26</sub> N <sub>2</sub> O <sub>3</sub>                | 414.5               | 5497186    |
|                                           | Pirenperone                                            | C <sub>23</sub> H <sub>24</sub> FN <sub>3</sub> O <sub>2</sub>               | 393.5               | 4847       |
|                                           | Quercitrin                                             | C <sub>15</sub> H <sub>10</sub> O <sub>7</sub>                               | 302.23              | 5280343    |
|                                           | Rhodoxanthin                                           | C <sub>40</sub> H <sub>50</sub> O <sub>2</sub>                               | 562.8               | 5281251    |
|                                           | Sesamin                                                | C <sub>20</sub> H <sub>18</sub> O <sub>6</sub>                               | 354.4               | 72307      |

|                           |                                       |                                                 |        |           |
|---------------------------|---------------------------------------|-------------------------------------------------|--------|-----------|
| <i>S. aromaticum</i>      | Usambarensine                         | C <sub>29</sub> H <sub>28</sub> N <sub>4</sub>  | 432.6  | 5281413   |
|                           | Biflorin                              | C <sub>16</sub> H <sub>18</sub> O <sub>9</sub>  | 354.31 | 441959    |
|                           | Crategolic acid                       | C <sub>30</sub> H <sub>48</sub> O <sub>4</sub>  | 472.7  | 73659     |
|                           | Myricetin                             | C <sub>15</sub> H <sub>10</sub> O <sub>8</sub>  | 318.23 | 5281672   |
|                           | Oleanolic acid                        | C <sub>30</sub> H <sub>48</sub> O <sub>3</sub>  | 456.7  | 10494     |
|                           | Rhamnetin                             | C <sub>16</sub> H <sub>12</sub> O <sub>7</sub>  | 316.26 | 5281691   |
| <i>Citrus spp.</i>        | Stigmasterol                          | C <sub>29</sub> H <sub>48</sub> O               | 412.7  | 5280794   |
|                           | Hesperidin                            | C <sub>28</sub> H <sub>34</sub> O <sub>15</sub> | 610.6  | 10621     |
|                           | Naringin                              | C <sub>27</sub> H <sub>32</sub> O <sub>14</sub> | 580.5  | 442428    |
| <i>N. sativa</i>          | β-sitosterol                          | C <sub>31</sub> H <sub>52</sub> O <sub>2</sub>  | 456.7  | 521199    |
|                           | Cycloartenol                          | C <sub>30</sub> H <sub>50</sub> O               | 426.7  | 92110     |
| <i>O. basilicum</i>       | Chicoric acid                         | C <sub>22</sub> H <sub>18</sub> O <sub>12</sub> | 474.4  | 5281764   |
| <i>P. nigrum</i> Linn     | Piperettine                           | C <sub>19</sub> H <sub>21</sub> NO <sub>3</sub> | 311.4  | 101878852 |
|                           | 2-Phenylquinoline-4-carboxylic acid   | C <sub>16</sub> H <sub>11</sub> NO <sub>2</sub> | 249.26 | 8593      |
|                           | 3-Methyl-3H-cyclonona[def]biphenylene | C <sub>18</sub> H <sub>14</sub>                 | 230.3  | 5376621   |
|                           | 5-beta-Cholest-24-en-12-one           | C <sub>27</sub> H <sub>44</sub> O               | 384.6  | 22212498  |
|                           | Beta-Sitosterol                       | C <sub>29</sub> H <sub>50</sub> O               | 414.7  | 222284    |
|                           | Campesterol                           | C <sub>28</sub> H <sub>48</sub> O               | 400.7  | 173183    |
| <i>M. speciosa korthi</i> | Chlorogenic acid                      | C <sub>16</sub> H <sub>18</sub> O <sub>9</sub>  | 354.31 | 1794427   |
|                           | Cholest-24-en-12-one                  | C <sub>27</sub> H <sub>44</sub> O               | 384.6  | 22212498  |
|                           | Dibenzo[a,h]cyclotetradecene          | C <sub>30</sub> H <sub>52</sub>                 | 412.7  | 634348    |
|                           | Gamma-Sitosterol                      | C <sub>29</sub> H <sub>50</sub> O               | 414.7  | 457801    |
|                           | Isoquercitrin                         | C <sub>21</sub> H <sub>20</sub> O <sub>12</sub> | 464.4  | 5280804   |
|                           | Rutin                                 | C <sub>27</sub> H <sub>30</sub> O <sub>16</sub> | 610.5  | 5280805   |
|                           | Stigmasterol                          | C <sub>29</sub> H <sub>48</sub> O               | 412.7  | 5280794   |
| <b>Kabasura kudineer</b>  |                                       |                                                 |        |           |
| <i>C. serratum</i>        | Acteoside                             | C <sub>29</sub> H <sub>36</sub> O <sub>15</sub> | 624.6  | 5281800   |
|                           | Serratagenic acid                     | C <sub>30</sub> H <sub>46</sub> O <sub>5</sub>  | 486.7  | 21594175  |
|                           | Verbascoside                          | C <sub>29</sub> H <sub>36</sub> O <sub>15</sub> | 624.6  | 5281800   |
|                           | Campesterol                           | C <sub>28</sub> H <sub>48</sub> O               | 400.7  | 173183    |
| <i>H. schumach</i>        | Apigenin 7-O-glucoside                | C <sub>21</sub> H <sub>18</sub> O <sub>11</sub> | 446.4  | 5319484   |
| <i>T. cucumerina</i>      | Cucurbitacin B                        | C <sub>32</sub> H <sub>46</sub> O <sub>8</sub>  | 558.7  | 5281316   |
| <i>A. paniculate</i>      | Neoandrographolide                    | C <sub>26</sub> H <sub>40</sub> O <sub>8</sub>  | 480.6  | 9848024   |
|                           | Orientin                              | C <sub>21</sub> H <sub>20</sub> O <sub>11</sub> | 448.4  | 5281675   |
| <i>M. cerviana</i>        | Vitexin                               | C <sub>21</sub> H <sub>20</sub> O <sub>10</sub> | 432.4  | 5280441   |
| <i>T. involucrate</i>     | Rutin                                 | C <sub>27</sub> H <sub>30</sub> O <sub>16</sub> | 610.5  | 5280805   |
| <i>T. cordifolia</i>      | Tinosporide                           | C <sub>20</sub> H <sub>22</sub> O <sub>7</sub>  | 374.4  | 167631    |

**Table S2.** The molecular properties of screened phytochemicals with the  $\leq -6.0$  kcal/mol binding energy against RBD Domain.

| Plant Name                               | Compound Name                                  | Molecular Formula                                             | Mol. Weight (g/mol) | PubChem ID |
|------------------------------------------|------------------------------------------------|---------------------------------------------------------------|---------------------|------------|
| <b>B.1.617.2. S-Protein - RBD-Domain</b> |                                                |                                                               |                     |            |
| <i>H. cordata</i>                        | 3-Benzoyloxy-6-oxo-12-ursen-28-oic acid        | C <sub>37</sub> H <sub>50</sub> O <sub>5</sub>                | 574.8               | 131751331  |
|                                          | 26,26,26-trifluoro-25-hydroxy-27-norvitamin D3 | C <sub>26</sub> H <sub>39</sub> F <sub>3</sub> O <sub>2</sub> | 440.6               | 9547284    |
|                                          | Canthaxanthin                                  | C <sub>40</sub> H <sub>52</sub> O <sub>2</sub>                | 564.8               | 5281227    |
|                                          | Cholest-4,14-dien-15,20-diol-3,16-dione        | C <sub>27</sub> H <sub>42</sub> O                             | 382.6               | 11280      |
|                                          | Fluorometholone 17-acetate                     | C <sub>24</sub> H <sub>31</sub> FO <sub>5</sub>               | 418.5               | 240767     |
|                                          | Kanzonol V                                     | C <sub>24</sub> H <sub>24</sub> O <sub>4</sub>                | 376.4               | 102444980  |
|                                          | Murrayenol                                     | C <sub>30</sub> H <sub>46</sub> O <sub>4</sub>                | 470.7               | 73086673   |
|                                          | Progeldanamycin                                | C <sub>27</sub> H <sub>41</sub> NO <sub>6</sub>               | 475.6               | 49787025   |
|                                          | Quercetin                                      | C <sub>15</sub> H <sub>10</sub> O <sub>7</sub>                | 302.23              | 5280343    |
|                                          | Rhamnetin                                      | C <sub>16</sub> H <sub>12</sub> O <sub>7</sub>                | 316.26              | 5281691    |
|                                          | Rhodoxanthin                                   | C <sub>40</sub> H <sub>50</sub> O <sub>2</sub>                | 562.8               | 5281251    |
|                                          | Sesamin                                        | C <sub>20</sub> H <sub>18</sub> O <sub>6</sub>                | 354.4               | 72307      |
|                                          | Stigmastane-3,6-dione, (5.alpha.)              | C <sub>29</sub> H <sub>48</sub> O <sub>2</sub>                | 428.7               | 13992092   |
|                                          | Usambarensine                                  | C <sub>29</sub> H <sub>28</sub> N <sub>4</sub>                | 432.6               | 5281413    |
| <i>S. aromaticum</i>                     | Kaempferol                                     | C <sub>15</sub> H <sub>10</sub> O <sub>6</sub>                | 286.24              | 5280863    |
|                                          | Myricetin                                      | C <sub>15</sub> H <sub>10</sub> O <sub>8</sub>                | 318.23              | 5281672    |
|                                          | Oleanolic acid                                 | C <sub>30</sub> H <sub>48</sub> O <sub>3</sub>                | 456.7               | 10494      |
|                                          | Rhamnetin                                      | C <sub>16</sub> H <sub>12</sub> O <sub>7</sub>                | 316.26              | 5281691    |
| <i>Citrus spp.</i>                       | Apigenin                                       | C <sub>15</sub> H <sub>10</sub> O <sub>5</sub>                | 270.24              | 5280443    |
|                                          | Diosmetin                                      | C <sub>16</sub> H <sub>12</sub> O <sub>6</sub>                | 300.26              | 5281612    |
|                                          | Hesperidin                                     | C <sub>28</sub> H <sub>34</sub> O <sub>15</sub>               | 610.6               | 10621      |
|                                          | Luteolin                                       | C <sub>15</sub> H <sub>10</sub> O <sub>6</sub>                | 286.24              | 5280445    |
|                                          | Naringenin                                     | C <sub>15</sub> H <sub>12</sub> O <sub>5</sub>                | 272.25              | 932        |
|                                          | Naringin                                       | C <sub>27</sub> H <sub>32</sub> O <sub>14</sub>               | 580.5               | 442428     |
|                                          | Rutin                                          | C <sub>27</sub> H <sub>30</sub> O <sub>16</sub>               | 610.5               | 5280805    |
| <i>N. sativa</i>                         | Nigellidine                                    | C <sub>18</sub> H <sub>18</sub> N <sub>2</sub> O <sub>2</sub> | 294.3               | 136828302  |
| <i>O. basilicum</i>                      | Chicoric acid                                  | C <sub>22</sub> H <sub>18</sub> O <sub>12</sub>               | 474.4               | 5281764    |
| <i>P. nigrum</i>                         | 3-Heptadecen-5-yne, (Z)                        | C <sub>17</sub> H <sub>30</sub>                               | 234.4               | 5367448    |
|                                          | Benzo[c] cinnolin-2-amine                      | C <sub>12</sub> H <sub>9</sub> N <sub>3</sub>                 | 195.22              | 606883     |
|                                          | Copaene                                        | C <sub>15</sub> H <sub>24</sub>                               | 204.35              | 12303902   |
|                                          | Dodec-5-yn-6-one                               | C <sub>12</sub> H <sub>20</sub> O                             | 180.29              | 572843     |
|                                          | Guineensine                                    | C <sub>24</sub> H <sub>33</sub> NO <sub>3</sub>               | 383.5               | 6442405    |
|                                          | Piperine                                       | C <sub>17</sub> H <sub>19</sub> NO <sub>3</sub>               | 285.34              | 638024     |
|                                          | Piperolein                                     | C <sub>19</sub> H <sub>25</sub> NO <sub>3</sub>               | 315.4               | 11141599   |
|                                          | Sarmentine                                     | C <sub>14</sub> H <sub>23</sub> NO                            | 221.34              | 6440616    |

|                           |                                       |                                                               |        |          |
|---------------------------|---------------------------------------|---------------------------------------------------------------|--------|----------|
| <i>M. speciosa</i> Korthi | 2-Phenylquinoline-4-carboxylic acid   | C <sub>16</sub> H <sub>11</sub> NO <sub>2</sub>               | 249.26 | 8593     |
|                           | 3-Methyl-3H-cyclonona[def]biphenylene | C <sub>18</sub> H <sub>14</sub>                               | 230.3  | 5376621  |
|                           | Beta-Sitosterol                       | C <sub>29</sub> H <sub>50</sub> O                             | 414.7  | 222284   |
|                           | Chlorogenic acid                      | C <sub>16</sub> H <sub>18</sub> O <sub>9</sub>                | 354.31 | 1794427  |
|                           | Corynantheidine                       | C <sub>22</sub> H <sub>28</sub> N <sub>2</sub> O <sub>3</sub> | 368.5  | 3000341  |
|                           | Gamma-Sitosterol                      | C <sub>29</sub> H <sub>50</sub> O                             | 414.7  | 457801   |
|                           | Isoquercitrin                         | C <sub>21</sub> H <sub>20</sub> O <sub>12</sub>               | 464.4  | 5280804  |
|                           | Quercetin 3-galactoside               | C <sub>21</sub> H <sub>20</sub> O <sub>12</sub>               | 464.4  | 5281643  |
|                           | Rutin                                 | C <sub>27</sub> H <sub>30</sub> O <sub>16</sub>               | 610.5  | 5280805  |
|                           | Stigmasterol                          | C <sub>29</sub> H <sub>48</sub> O                             | 412.7  | 5280794  |
| <b>Kabasura kudineer</b>  |                                       |                                                               |        |          |
| <i>H. auriculata</i>      | Apigenin-7-O-glucuronide              | C <sub>21</sub> H <sub>18</sub> O <sub>11</sub>               | 446.4  | 5319484  |
|                           | Apigenin-7-O-glucoside                | C <sub>21</sub> H <sub>20</sub> O <sub>10</sub>               | 432.4  | 44257792 |
| <i>C. serratum</i>        | Apigenin                              | C <sub>15</sub> H <sub>10</sub> O <sub>5</sub>                | 270.24 | 5280443  |
|                           | Clerodermic acid                      | C <sub>20</sub> H <sub>28</sub> O <sub>4</sub>                | 332.4  | 16745295 |
|                           | Scutellarein                          | C <sub>15</sub> H <sub>10</sub> O <sub>6</sub>                | 286.24 | 5281697  |
| <i>T. chebula</i>         | Arjungenin                            | C <sub>30</sub> H <sub>48</sub> O <sub>6</sub>                | 504.7  | 12444386 |
|                           | Ellagic acid                          | C <sub>14</sub> H <sub>6</sub> O <sub>8</sub>                 | 302.19 | 5281855  |
| <i>T. cordifolia</i>      | Berberine                             | C <sub>20</sub> H <sub>18</sub> NO <sub>4</sub> <sup>+</sup>  | 336.4  | 2353     |
| <i>P. nigrum</i>          | Chavicine                             | C <sub>17</sub> H <sub>19</sub> NO <sub>3</sub>               | 285.34 | 1548912  |
| <i>C. aromaticus</i>      | Chlorogenic acid                      | C <sub>16</sub> H <sub>18</sub> O <sub>9</sub>                | 354.31 | 1794427  |
| <i>Benth</i>              |                                       |                                                               |        |          |
| <i>C. speciosus</i> Sm    | Diosgenin                             | C <sub>27</sub> H <sub>42</sub> O <sub>3</sub>                | 414.6  | 99474    |
|                           | Eremanthin                            | C <sub>15</sub> H <sub>18</sub> O <sub>2</sub>                | 230.3  | 100572   |
|                           | Hispidulin                            | C <sub>16</sub> H <sub>12</sub> O <sub>6</sub>                | 300.26 | 5281628  |
|                           | Lupeol                                | C <sub>30</sub> H <sub>50</sub> O                             | 426.7  | 259846   |
| <i>C. rotundus</i>        | Luteolin                              | C <sub>15</sub> H <sub>10</sub> O <sub>6</sub>                | 286.24 | 5280445  |
| <i>A. paniculate</i>      | Neoandrographolide                    | C <sub>26</sub> H <sub>40</sub> O <sub>8</sub>                | 480.6  | 9848024  |
| <i>P. nigrum</i>          | Piperine                              | C <sub>17</sub> H <sub>19</sub> NO <sub>3</sub>               | 285.34 | 638024   |
| <i>C. aromaticus</i>      | Rosmarinic acid                       | C <sub>18</sub> H <sub>16</sub> O <sub>8</sub>                | 360.3  | 5281792  |
| <i>Justicia adhatoda</i>  | Vasicinolone                          | C <sub>11</sub> H <sub>10</sub> N <sub>2</sub> O <sub>3</sub> | 218.21 | 13970119 |
|                           | Vasicoline                            | C <sub>19</sub> H <sub>21</sub> N <sub>3</sub>                | 291.4  | 626005   |

**Table S3.** Binding affinity, interacting residues and bond length for the screened phytochemicals against mutated NTD in S-Protein.

| Plant                                         | Phytochemicals                                         | Binding Affinity | H/C-H Interaction                | Bond | Bond length | Hydrophobic interaction                                                | Alkyl interaction                      | Pi-Sigma /CationStacked Interaction |
|-----------------------------------------------|--------------------------------------------------------|------------------|----------------------------------|------|-------------|------------------------------------------------------------------------|----------------------------------------|-------------------------------------|
| <b>B.1.617.2. S-Protein – NTD Mutant Type</b> |                                                        |                  |                                  |      |             |                                                                        |                                        |                                     |
| Standard Drug                                 | Cefuroxime                                             | -6.1             | ARG102, GLY103*, TYR170, SER172* | 2.35 |             | ILE101, TRP104, ILE119, VAL120, ASN121, VAL126, ILE128, MET177, PHE192 | LEU226,                                | ARG190                              |
| <i>H. cordata</i>                             | 6alpha,9-Difluoro-11beta-hydroxypregn-4-ene-3,20-dione | -8.3             | GLY103*                          | -    |             | ILE101, TRP104, ASN121, VAL126, ILE128, PHE192, LEU226, VAL227         | ARG102, ILE119, ARG190,                | -                                   |
|                                               | Diosgenin                                              | -7.5             | ASN121                           | 4.64 |             | GLY103, MET177, ARG190                                                 | VAL126, ILE101, TRP104, PHE175, PHE192 | -                                   |
|                                               | Kanzonol                                               | -8.0             | ASN121*                          | -    |             | SER172, MET177, VAL227                                                 | LEU176, PHE194, PHE192, LEU226         | PHE175, ILE128, ILE203,             |
|                                               | Murrayenol                                             | -6.6             | PHE157*                          |      |             | ASN122, THR124, GLU154, VAL159                                         | ALA123, MET153,                        | TYR160                              |

|                         |              |      |                                                |                                          |                                                                                                                             |  |                                         |
|-------------------------|--------------|------|------------------------------------------------|------------------------------------------|-----------------------------------------------------------------------------------------------------------------------------|--|-----------------------------------------|
| S.<br><i>aromaticum</i> | Myricetin    | -6.0 | TYR28, SER60*,<br>TYR269, GLN271,              | 5.40,<br>4.46,<br>4.40,<br>4.73,<br>5.90 | LEU56, ASN61, -<br>VAL62, THR63,<br>PHE65, LEU84                                                                            |  | TYR269                                  |
|                         | Stigmasterol | -6.3 | -                                              | -                                        | ASN122, THR124, ALA123<br>TRP152, MET153,<br>GLU154, TYR160,<br>LEU176, LEU179                                              |  | PHE157                                  |
| Citrus spp.             | Hesperidin   | -7.1 | GLU154*, VAL159,<br>TYR160, TYR160*,<br>ALA163 | 5.20,<br>4.51,<br>2.92                   | GLN14, CYS15,<br>ASN122, VAL127,<br>LYS129, SER155,<br>ARG158, SER161,<br>SER162, PHE133                                    |  | PHE157,<br>GLU156,<br>PHE157,<br>TYR160 |
|                         | Naringenin   | -6.8 | ILE101                                         | 3.58                                     | GLU96, ARG102, VAL126, LEU226<br>GLY103, ILE119,<br>ASN121, ILE128,<br>TYR170, SER172,<br>ARG190, ILE203,<br>VAL227, LEU229 |  | TRP104,<br>PHE192                       |
| N. sativa               | β-sitosterol | -6.0 | GLN14                                          | 3.26                                     | LEU118, VAL120, VAL127, PHE157,<br>ASN122, LYS129, TYR160<br>ARG158, VAL15,<br>SER161, VAL171                               |  | PHE157,<br>TYR160                       |
|                         | Cycloartenol | -8.6 | GLU96                                          | 5.80                                     | ILE101, ARG102, VAL126<br>GLY103, TRP104,<br>ILE119, ASN121,                                                                |  | -                                       |

|                                          |                                            |      |                                               |               |  |                                                                                                                |  |  |  |  |
|------------------------------------------|--------------------------------------------|------|-----------------------------------------------|---------------|--|----------------------------------------------------------------------------------------------------------------|--|--|--|--|
|                                          |                                            |      |                                               |               |  | ILE128, TYR170,<br>SER172, PHE175,<br>PHE192, ILE203,<br>LEU226, VAL227                                        |  |  |  |  |
| <i>O. basilicum</i>                      | Chicoric acid                              | -6.6 | ASN122, ALA123, 5.02,<br>TYR160 3.56,<br>5.22 |               |  | VAL127, LYS129, LEU179 ALA123<br>TRP152, MET153, PHE157<br>SER155, GLU156,<br>PHE175, MET177,<br>ASP178        |  |  |  |  |
| <i>P. nigrum</i>                         | Piperettine                                | -8.0 | ARG190, ASN121                                | 4.46,<br>4.54 |  | GLU96, ILE101, TRP104, ILE119, -<br>ARG102, GLY10, TYR170, PHE192,<br>VAL126, ILE128, LEU226, VAL227<br>ILE203 |  |  |  |  |
| Kabasura<br>kudineer                     | (3R,8S,9S,10R,13R,14R,17R)-17-<br>[(2R,5S) | -6.8 | -                                             | -             |  | ASN121, ILE128, VAL126, PHE175, -<br>TYR170, SER172, LEU226, VAL227<br>LEU176, MET177,<br>ILE203, LEU229       |  |  |  |  |
|                                          | Campesterol                                | -7.2 | ARG190                                        | 4.20          |  | ILE119, ASN121, AL126, PHE192,<br>ILE128, TYR170, ILE203, LEU226,<br>SER172, GLN173 VAL227                     |  |  |  |  |
| <i>Mitragyna<br/>speciosa<br/>Korthi</i> | 2-Phenylquinoline-4-carboxylic<br>acid     | -6.8 | -                                             |               |  | ILE119, ILE128, VAL126, VAL227, TYR170,<br>PHE168, ILE203, TYR170 LEU226<br>LEU229                             |  |  |  |  |
|                                          | 3-Methyl-3H-<br>cyclonona[def]biphenylene  | -6.6 | -                                             | -             |  | ILE128, PHE168, TYR170, VAL227 -<br>LEU229                                                                     |  |  |  |  |
|                                          | 5-beta-Cholest-24-en-12-one                | -6.4 | -                                             | -             |  | ILE128, PHE168, VAL126, TYR170, -<br>SER172, LEU226, VAL227                                                    |  |  |  |  |

|                             |      |   |   |                                                                                                  |  |  |  |  |
|-----------------------------|------|---|---|--------------------------------------------------------------------------------------------------|--|--|--|--|
|                             |      |   |   | ASP228, LEU229, PRO230                                                                           |  |  |  |  |
| Beta-Sitosterol             | -6.4 |   |   | ILE119, ILE128, VAL126, LEU226 TYR170<br>PHE168, PHE192,<br>ILE203, VAL227,<br>LEU229            |  |  |  |  |
| Campesterol                 | -6.7 |   |   | ILE119, ILE128, VAL126, LEU226 TYR170<br>PHE168, PHE192,<br>VAL227, LEU229                       |  |  |  |  |
| Cholest-24-en-12-one        | -7.2 | - | - | VAL126, ILE128, TRP104, ILE119, -<br>TYR170, LEU229 PHE192, PHE194,<br>ILE203, LEU226,<br>VAL227 |  |  |  |  |
| Dibenzo[a,h]cycloetradecene | -6.1 | - | - | PHE168, TYR200, ILE128, TYR170, -<br>ASP228, LEU229 VAL227, PRO230                               |  |  |  |  |
| Gamma-Sitosterol            | -6.4 | - | - | PHE168, LEU229 ILE119, VAL126, TYR170<br>ILE128, ILE203,<br>LEU226, VAL227                       |  |  |  |  |
| Stigmasterol                | -7.3 | - | - | VAL126, ILE128, TYR170, TYR200, -<br>PHE168, ASP228, LEU226, VAL227,<br>LEU229 PRO230            |  |  |  |  |

**Table S4.** Binding affinity, interacting residues and bond length for the screened phytochemicals against RBD in S-Protein.

| Plant                                    | Compound                                       | Binding Affinity | H/C-H Interaction | Bond | Bond length | Hydrophobic interaction                                | Alkyl interaction                               | Pi-Sigma /CationStacked Interaction |
|------------------------------------------|------------------------------------------------|------------------|-------------------|------|-------------|--------------------------------------------------------|-------------------------------------------------|-------------------------------------|
| <b>B.1.617.2. S-Protein - RBD-Domain</b> |                                                |                  |                   |      |             |                                                        |                                                 |                                     |
| <i>H. cordata</i>                        | 3-Benzoyloxy-6-oxo-12-ursen-28-oic acid        | -6.1             | ARG408, GLN409    |      | 6.01, 5.09  | ARG403, GLU406, GLY416, TYR505                         | ASP405, THR415, ASP420,                         | LYS417                              |
|                                          | 26,26,26-trifluoro-25-hydroxy-27-norvitamin D3 | -6.1             | SER469            |      | 2.85        | ARG454, ARG457, GLU471, TYR473, THR478, CYC480         | PHE456, THR470, ILE472, SER477, PRO479,         | LYS458, PRO491                      |
|                                          | Murrayenol                                     |                  | GLY482            |      |             | ARG454, ARG457, ASP467, GLU471, TYR473, CYS480, PRO491 | PHE456, LYS458, SER469, ILE472, GLN474, ASN481, |                                     |
|                                          | Quercetin                                      | -6.6             | ARG454, PHE456    |      |             | ASP467, ILE472, CYS480, PRO491                         | GU471, ARG457                                   | LYS458, TYR473                      |



|                           |                          |      |                                                                         |                                                   |  |  |  |                                                                                                       |        |
|---------------------------|--------------------------|------|-------------------------------------------------------------------------|---------------------------------------------------|--|--|--|-------------------------------------------------------------------------------------------------------|--------|
|                           |                          |      |                                                                         |                                                   |  |  |  | ILE472, TYR473,<br>CYS480, PRO491                                                                     |        |
|                           | Luteolin                 | -7.1 | ARG454, SER469                                                          | 3.53, 5.82                                        |  |  |  | PHE456, ASP467, ARG457<br>THR470, ILE472,<br>TYR473, GLN474,<br>CYS480, PRO491                        | LYS458 |
|                           | Naringenin               |      | GLN474, ASP467                                                          | 4.76, 4.49                                        |  |  |  | ARG454, PHE456, ARG457,<br>SER469, GLU471, LYS458<br>ILE472, TYR473,<br>CYS480, PRO491                |        |
|                           | Naringin                 | -7.7 | ARG457, GLU465,<br>ARG466*, ASP467                                      | 5.66, 5.27,<br>7.39*, 2.96                        |  |  |  | ARG454, PHE456,<br>SER459, ILE468,<br>SER469, GLU471,<br>ILE472, TYR473,<br>GLN474, CYS480,<br>PRO491 | LYS458 |
|                           | Rutin                    | -7.0 | ARG454, ARG457,<br>LYS458, SER459,<br>ASP467, SER469,<br>GLU471, ILE472 | 4.83, 5.48,<br>5.20, 4.13,<br>3.08, 4.02,<br>4.13 |  |  |  | PHE456, TYR473,<br>CYS480, GLY482,<br>PRO491                                                          | GLU471 |
| <i>N. sativa</i>          | Nigellidine              | -6.4 | ARG454, PHE456,<br>TYR473*, GLN474                                      | 4.32, 5.75,<br>4.02*, 5.23                        |  |  |  | SER469, GLU471, ARG457<br>ILE472, PRO491                                                              | LYS458 |
| <i>O. basilicum</i>       | Chicoric_acid            | -6.7 | ARG454, LYS458,<br>ASP467, SER469*,<br>GLU471, ILE472                   | 2.96, 6.55,<br>5.98, 4.89,<br>4.75 6.36           |  |  |  | THR470, GLN474, ARG457<br>PRO479, PRO491                                                              |        |
| <i>P. nigrum</i><br>Linn. | 3-Heptadecen-5-yne, (Z)- | -7.5 | -                                                                       | -                                                 |  |  |  | VAL524<br>PHE342,<br>PHE338,                                                                          | -      |

|                           |      |                |            |                                      |                    |                                                                                                                                 |                   |
|---------------------------|------|----------------|------------|--------------------------------------|--------------------|---------------------------------------------------------------------------------------------------------------------------------|-------------------|
|                           |      |                |            |                                      |                    | ALA363,<br>TYR365,<br>LEU368,<br>TYR369,<br>PHE374,<br>PHE377,<br>LEU387,<br>PHE392,<br>VAL395,<br>ILE434,<br>LEU513,<br>PHE515 |                   |
| Benzo[c] cinnolin-2-amine | -7.0 | ALA372, PHE374 | 3.66, 5.32 | TYR365, SER373                       |                    | LEU368,<br>ALA372                                                                                                               | PHE377,<br>PHE374 |
| Copaene                   | -8.6 | -              | -          | PHE342,<br>PHE377,<br>ILE434         | PHE374,<br>LEU368, | PHE338,<br>ALA363,<br>LEU387,<br>PHE392,<br>CYS432,<br>LEU513,<br>PHE515                                                        | TYR365            |
| Dodec-5-yn-6-one          | -6.3 | -              | -          | PHE342,<br>PHE392,<br>LEU513, PHE515 | LEU387,<br>ILE434, | CYS336,<br>PRO337,<br>PHE338,<br>VAL341,<br>ILE358,<br>ALA363,                                                                  | -                 |

|             |      |                                     |            |  |                                         |                               |                                                                                                |                              |
|-------------|------|-------------------------------------|------------|--|-----------------------------------------|-------------------------------|------------------------------------------------------------------------------------------------|------------------------------|
|             |      |                                     |            |  |                                         |                               | TYR365,<br>VAL395,<br>VAL524                                                                   |                              |
| Guineensine | -7.6 | -                                   | -          |  | PHE338,<br>ALA372,<br>PHE515, VAL524    | ALA363,<br>SER373,<br>VAL524  | TYR365,<br>LEU368,<br>TYR369,<br>PHE374,<br>PHE377,<br>PRO384,<br>LEU387,<br>ILE434,<br>LEU513 | CYS432,<br>PHE392            |
| Piperine    | -6.2 | GLU340*, ARG346,<br>ALA352*, SER399 | 4.67, 4.64 |  | VAL341,<br>SER349,<br>ASN354, LYS356    | PHE347,<br>TYR351,            | ALA348,<br>ALA352                                                                              | -                            |
| Piperolein  | -9.4 | -                                   |            |  | PHE338,<br>LEU368,<br>SER373,<br>VAL524 | PHE342,<br>ALA372,<br>LEU387, | ALA363,<br>TYR365,<br>PHE392,<br>VAL395,<br>ILE434,<br>PHE515,<br>LEU513,                      | TYR369,<br>PHE374,<br>PHE377 |
| Sarmentine  | -7.2 | -                                   | -          |  | PHE338,<br>SER373, PHE392               | LEU368,                       | TYR365,<br>PHE377,<br>LEU387,<br>TYR369,<br>ALA372,                                            | -                            |

|                      |                          |      |                   |         |                     |                                                    |                                          |                                                   |                   |
|----------------------|--------------------------|------|-------------------|---------|---------------------|----------------------------------------------------|------------------------------------------|---------------------------------------------------|-------------------|
|                      |                          |      |                   |         |                     |                                                    |                                          | PHE374,<br>CYS432,<br>ILE434<br>LEU513,<br>PHE515 |                   |
| Kabasura<br>kudineer | Apigenin-7-O-glucuronide | -7.2 | ARG454,<br>GLN474 | ASP467, |                     | PHE456<br>GLU471,<br>TYR473                        | SER469,<br>ILE472,                       |                                                   | LYS458            |
|                      | Apigenin                 | -6.0 | VAL341            |         | 3.72                | GLU340,<br>SER349,<br>LYS356                       | ARG346,<br>ASN354,                       | ALA344,<br>ALA348                                 | PHE347,<br>ALA348 |
|                      | Apigenin7-O-glucoside    | -7.1 | ALA352, SER399*   |         | 3,52, 6.29          | GLU340,<br>ALA348,<br>ASN354,<br>ALA397            | VAL341,<br>TRP353,<br>LYS356,            | ALA344                                            | PHE347            |
|                      | Arjungenin               | -6.5 | SER349, TYR351    |         | 2.92, 5.24,<br>3.48 | ARG346,<br>ALA348,<br>ASN354,<br>TYR451, LEU452    | PHE347,<br>ALA352,<br>ASN450,            | -                                                 | -                 |
|                      | Chavicine                | -6.1 |                   |         |                     | ARG454,<br>ARG457,<br>GLU471,<br>TYR473,<br>PRO491 | PHE456,<br>SER469,<br>ILE472,<br>GLN474, |                                                   | LYS458            |
|                      | Chlorogenic acid         | -6.5 | ASP467,<br>ILE472 | GLU471, | 5.03, 3.94,<br>3.96 | ARG454,<br>SER469,                                 | PHE456,<br>TYR473,                       | ARG457,<br>LYS458                                 | -                 |

|                    |      |                                                                                                                                                     |            |  |  |                                                                                                  |  |  |  |
|--------------------|------|-----------------------------------------------------------------------------------------------------------------------------------------------------|------------|--|--|--------------------------------------------------------------------------------------------------|--|--|--|
|                    |      |                                                                                                                                                     |            |  |  | GLN474, CYS480,<br>GLY482, PRO491                                                                |  |  |  |
| Ellagic acid       | -6.8 | SER469, TYR473, 4.32, 3.87, ARG454, PHE456, - LYS458,<br>GLN474 4.61 ARG457, THR470, GLU471<br>ILE472, PRO491                                       |            |  |  |                                                                                                  |  |  |  |
| Eremanthin         | -    | -                                                                                                                                                   | -          |  |  | ARG454, PHE456, ARG457, -<br>ASP467, SER469, LYS458,<br>GLU471, ILE472, TYR473<br>GLN474, PRO491 |  |  |  |
| Hispidulin         | -6.6 | LYS458, GLN474                                                                                                                                      | 4.35, 4.89 |  |  | ARG454, ASP467, ARG457, LYS458<br>SER469, GLU471, PRO491<br>ILE472, TYR473                       |  |  |  |
| Lupeol             | -    | -                                                                                                                                                   | -          |  |  | TYR449, LEU452, PHE490 -<br>GLU484, CYS488,<br>TYR489, LEU492,<br>GLN493, SER494                 |  |  |  |
| Luteolin           | -6.9 | ARG454, LYS458, 6.11, 3.95, SER469, THR470, ARG457, ARG457,<br>SER459, GLU471 4.37, 3.24, ILE472, TYR473, LYS458 ASP467<br>4.78 PRO491              |            |  |  |                                                                                                  |  |  |  |
| Neoandrographolide | -6.9 | ARG454, LYS458, 5.18, 4.28, PHE456, ARG457, - -<br>ASP467, GLU471, 4.27, 4.56, SER469, ILE472,<br>GLN474, CYS480 5.32, 5.18, TYR473, PRO479<br>4.29 |            |  |  |                                                                                                  |  |  |  |
| Piperine           | -6.2 | GLN474, GLN474*, 4.19, 4.69, ARG454, ARG457, - LYS458<br>SER469 4.40 GLU471, ILE472,<br>TYR473, GLY476,<br>SER477, PRO491                           |            |  |  |                                                                                                  |  |  |  |

|                                            |                                       |      |                                 |                                                                         |                                        |                                 |                                |                |
|--------------------------------------------|---------------------------------------|------|---------------------------------|-------------------------------------------------------------------------|----------------------------------------|---------------------------------|--------------------------------|----------------|
|                                            | Rosmarinic acid                       | -6.8 | ASP467, GLN474                  | 4.13, 5.07                                                              | PHE456, TYR473, ASN481, VAL483         | GLU471, CYS480, GLY482,         | ARG457                         | LYS458         |
|                                            | Scutellarein                          | -6.9 | ARG454, PHE456, GLN474          | 4.30, 6.13, 4.03                                                        | ASP467, ILE472                         | GLU471, ARG457, PRO491          |                                | TYR473, LYS458 |
|                                            | Vasicinolone                          | -6.3 | SER469, ILE472                  | 4.65, 5.67                                                              | ARG454, ASP467, GLN474                 | PHE456, TYR473, PRO491          | ARG457,                        | LYS458, GLU471 |
|                                            | Vasicoline                            | -6.1 | -                               | -                                                                       | PHE456, SER469, ILE472, GLN474, GLY482 | ARG457, GLU471, TYR473, CYS480, | PRO491                         | LYS458         |
| <i>Mitragyna speciosa</i><br><i>Korthi</i> | 2-Phenylquinoline-4-carboxylic acid   | -6.6 | -                               | -                                                                       | ARG454, GLU471, GLN474, PRO491         | PHE456, ILE472,                 | ARG457, LYS458                 | LYS458, TYR473 |
|                                            | 3-Methyl-3H-cyclonona[def]biphenylene | -6.6 | -                               | -                                                                       | ARG454, ASP467, GLU471, ILE472         | PHE456, SER469,                 | ARG457, LYS458, TYR473, PRO491 | -              |
|                                            | Chlorogenic acid                      | -6.6 | ARG454, PHE456, GLU471, CYS480* | ARG454*, SER469, GLN474, 5.80, 4.52*, 5.69, 3.45, 3.55, 378, 5.13, 3.87 | ARG457, ILE472, PRO479, GLY482         | THR470, TYR473,                 | LYS458, PRO491                 | -              |
|                                            | Corynantheidine                       | -6.1 | -                               | -                                                                       | ARG454, ASP467,                        | PHE456, SER469,                 | ARG457, CYS480                 | LYS458         |

|                         |      |                                                                                                                            |  |      |  |                                                                                                   |  |                   |  |
|-------------------------|------|----------------------------------------------------------------------------------------------------------------------------|--|------|--|---------------------------------------------------------------------------------------------------|--|-------------------|--|
|                         |      |                                                                                                                            |  |      |  | ILE472, TYR473,<br>GLN474, GLY482                                                                 |  |                   |  |
| Gamma-Sitosterol        | -6.3 | ARG454                                                                                                                     |  | 4.60 |  | ARG457, ASP467, LYS458<br>SER469, GLU471,<br>ILE472, TYR473,<br>GLN474, PRO479,<br>CYS480, ASN481 |  | -                 |  |
| Isoquercitrin           | -6.8 | ARG454, PHE456, 4.66, 5.75,<br>LYS458, SER469, 5.69, 4.29,<br>TYR473*, GLN474 3.92*, 3.82                                  |  |      |  | ASP467, ILE472, LYS458<br>PRO491                                                                  |  | LYS458,<br>GLN474 |  |
| Quercetin 3-galactoside | -6.7 | ARG454, ARG457, 5.65, 5.72,<br>SER469, GLU471*, 2.84, 4.16<br>CYS480                                                       |  |      |  | PHE456, ASP467, PRO491<br>THR470, GLU471,<br>ILE472, TYR473,<br>GLY482                            |  | -                 |  |
| Rutin                   | -7.0 | ARG454, PHE456, 4.57, 6.48,<br>LYS458*, ASP467, 6.83*, 4.82,<br>SER469, GLU471, 4.63, 4.44,<br>GLN474, CYS480* 4.29, 4.04* |  |      |  | THR470, ILE472, -<br>TYR473, ASN481,<br>GLY482                                                    |  | -                 |  |
